# Supplementary material
Source: Royal Society of Chemistry journal article supplement (doi:10.1039/d5cp04630k)
Supplement: d5cp04630k1.pdf [file d5cp04630k1.pdf]

## Supporting Information

### Activated graphite carbon assisted cadmium doped copper oxide nano catalyst for Accelerated Photocatalysis and desirable antibacterial activity

P. R. Nithiasri, J. Aarthi and B. Karthikeyan\*

Department of Chemistry, Annamalai University, Annamalainagar, Tamilnadu 608002, India.  
bkarthi\_au@yahoo.com

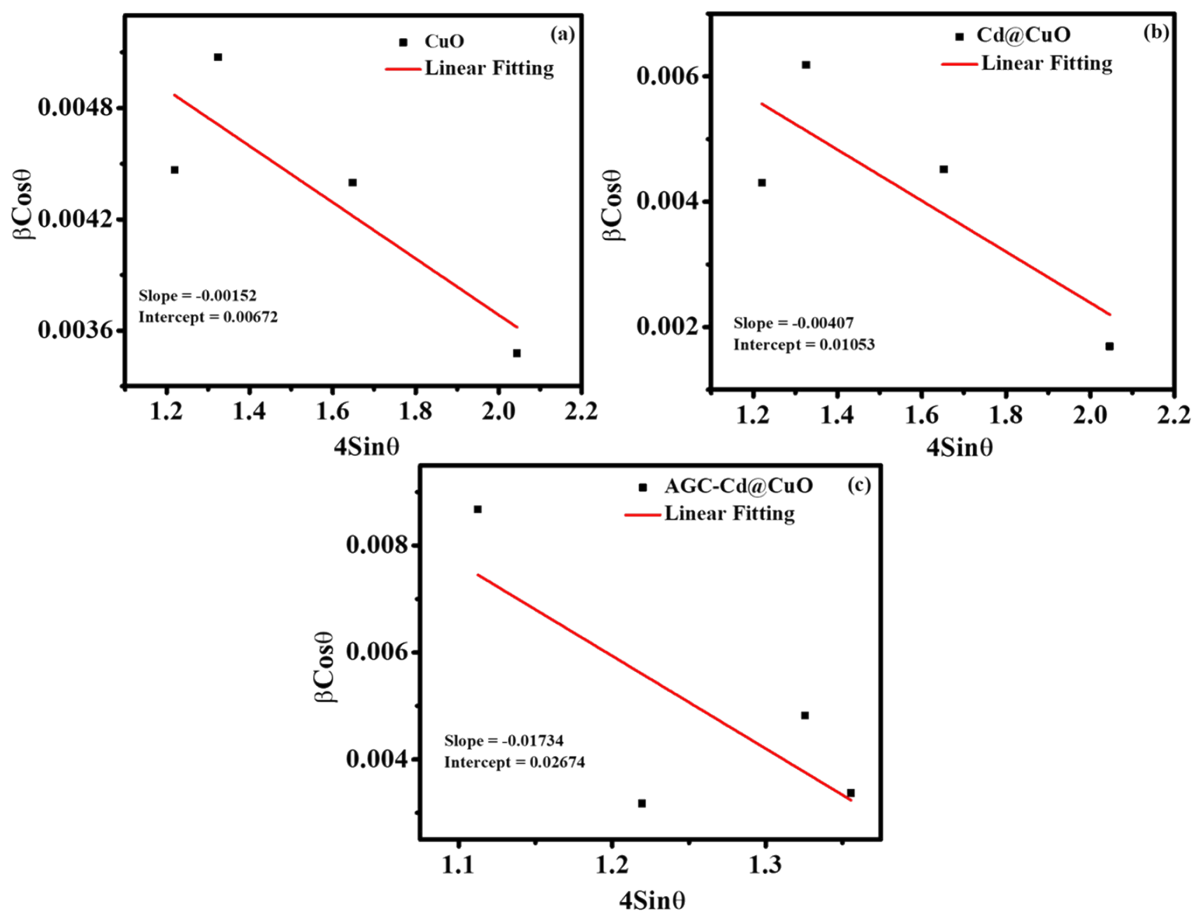

Fig. S1 Williamson-Hall plots for (a) CuO, (b) Cd@CuO and (c) AGC-Cd@CuO

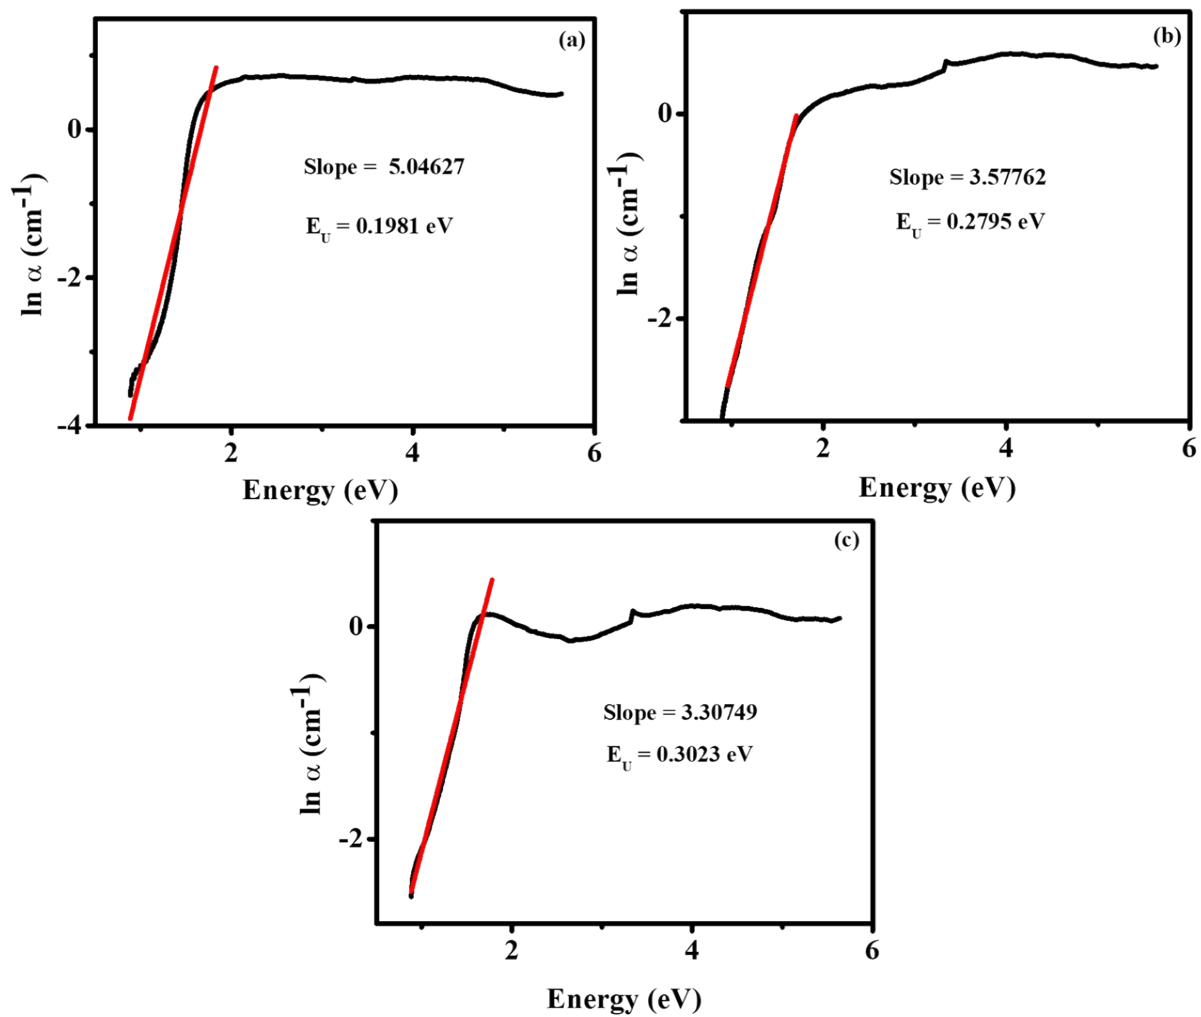

**Fig. S2** Urbach band tail width ( $E_U$ ) of (a) CuO, (b) Cd@CuO and (c) AGC-Cd@CuO

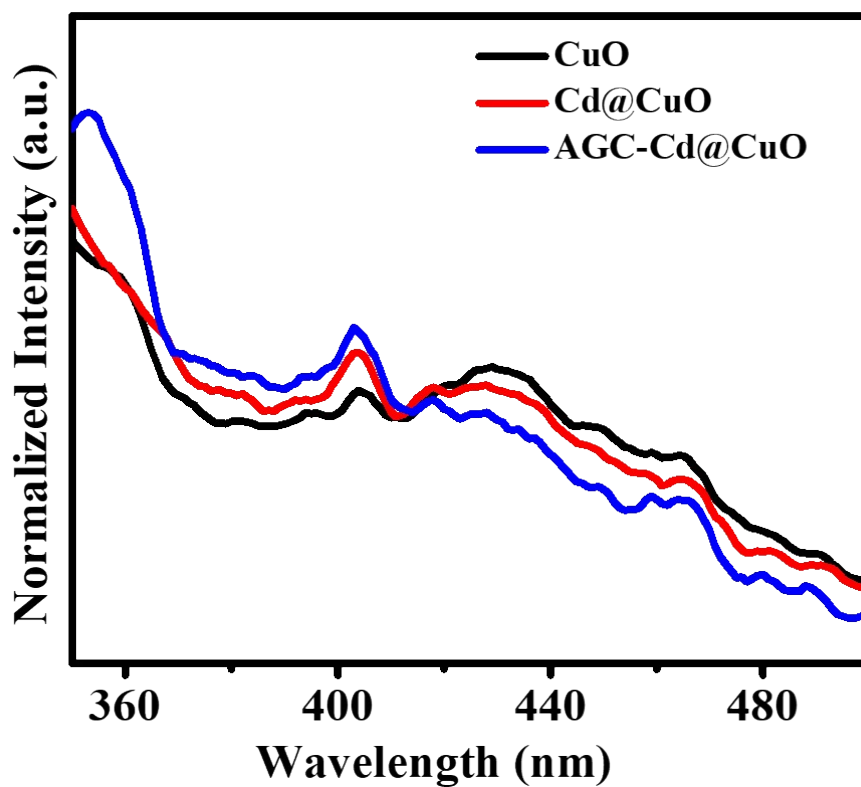

Fig. S3 Area Normalized photoluminescence spectra of CuO, Cd@CuO and AGC-Cd@CuO

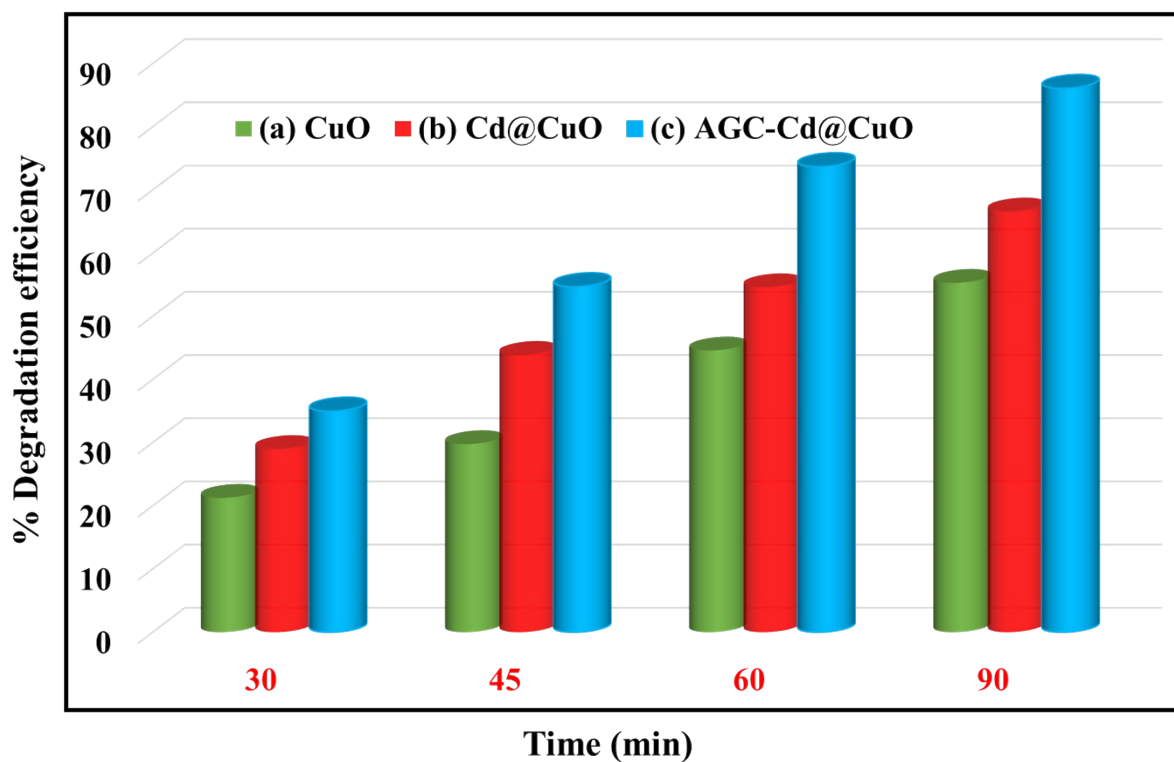

Fig. S4 Degradation efficiency % of CuO, Cd@CuO and AGC-Cd@CuO

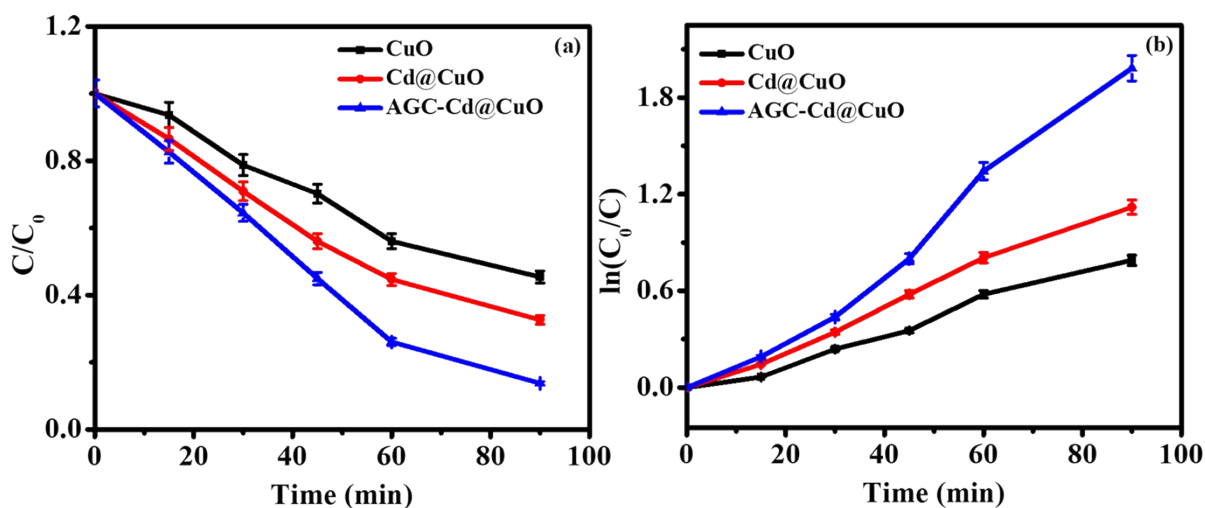

Fig. S5 (a, b) Error bar images for Kinetic graph of CuO, Cd@CuO and AGC-Cd@CuO catalysis

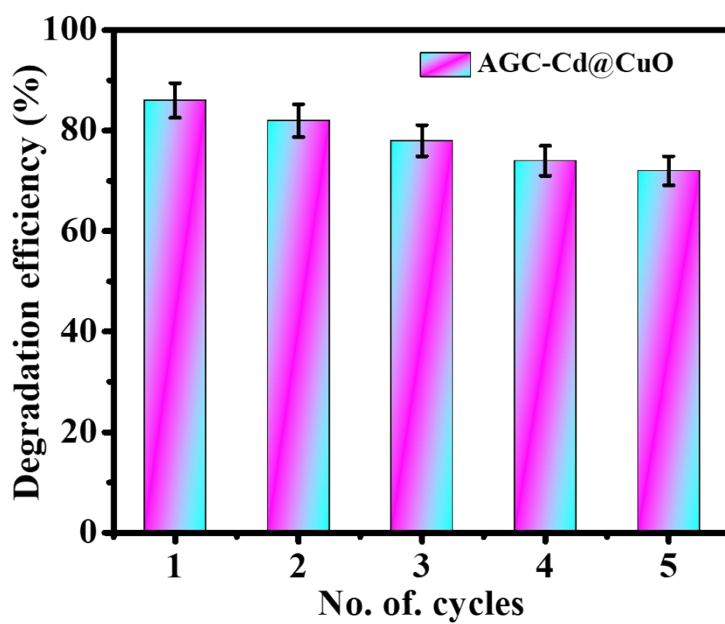

Fig. S6 Error bar images for recycle efficiency of AGC-Cd@CuO photocatalyst under five consecutive runs

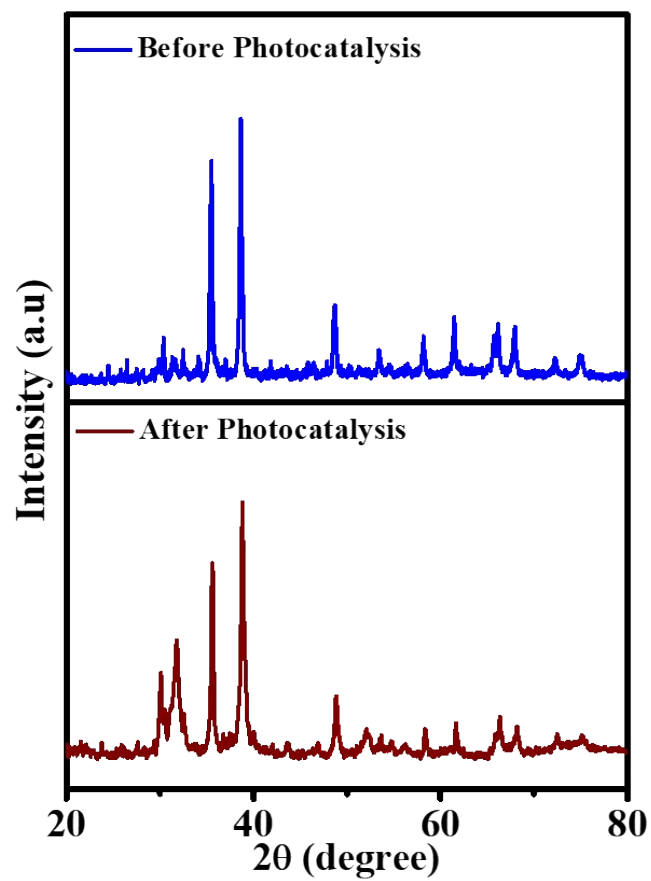

**Fig. S7 XRD spectra of AGC-Cd@CuO before and after five consecutive runs of the Photocatalysis process**

**Table No. S1 Literature review of CV degradation experiments in the presence of various photocatalysts**

| <b>Photocatalyst</b>                                       | <b>Degradation rate (%)</b> | <b>Time (min)</b> | <b>Reference</b> |
|------------------------------------------------------------|-----------------------------|-------------------|------------------|
| <b>AGC-Cd@CuO</b>                                          | <b>86.1</b>                 | <b>90</b>         | <b>This Work</b> |
| In(1%)-ZnO                                                 | 85                          | 210               | [1]              |
| Ag <sup>+</sup> /TiO <sub>2</sub>                          | 56                          | 105               | [2]              |
| 1.5mol%Cd-ZnO                                              | 71.01                       | 90                | [3]              |
| Fe <sub>3</sub> O <sub>4</sub> /SnO <sub>2</sub> (FS2-4:1) | 78                          | 180               | [4]              |
| ZnO                                                        | 82                          | 240               | [5]              |
| MnFe <sub>2</sub> O <sub>4</sub>                           | 25.13                       | 120               | [6]              |
| 3DMnO <sub>2</sub> nanofibernet                            | 84                          | 280               | [7]              |
| Gd(5):BFO                                                  | 72                          | 180               | [8]              |
| Ce <sub>2</sub> (MoO <sub>4</sub> ) <sub>3</sub> -CTAB     | 89                          | 300               | [9]              |
| PureFe <sub>3</sub> O <sub>4</sub>                         | 76                          | 180               | [4]              |

## REFERENCES

- [1] S. Ben Ameer, H. Belhadjltaief, B. Duponchel, G. Leroy, M. Amlouk, H. Guerhazi, S. Guerhazi, *Heliyon*, 2019, **5**, 01912.
- [2] C. Sahoo, A. Gupta, A. Pal, *Dyes Pigment*, 2005, **66**, 189-196.
- [3] M. F. Sanakousar, V. C.C, V. M. Jiménez-Pérez, B. K. Jayanna, M. Mounesh, A. H. Shridhar, K. Prakash, *J. Hazard. Mater. Adv.*, 2021, **2**, 100004.
- [4] V. M. Vinosel, M. A. Janifer, P. Praveena, S. Anand, S. Pauline, A. Stephen, S. Dhanavel, *J. Mater. Sci. Mater. Electron.*, 2019, **30**, 9663-9677.
- [5] J. Puneetha, N. Kottam, A. Rathna, *Inorg. Chem. Commun.*, 2021, **125**, 108460.
- [6] R. Rathore, A. Waghmare, S. Rai, V. Chandra, *ChemistrySelect*, 2023, **8**, 202301344.
- [7] M. Rahmat, A. Rehman, S. Rahmat, H. N. Bhatti, M. Iqbal, W. S. Khan, S. Z. Bajwa, R. Rahmat, A. Nazir, *J. Mater. Res. Technol.*, 2019, **8**, 5149-5159.
- [8] S. Kossar, I. B. S. Banu, N. Aman, R. Amiruddin, *J. Dispers. Sci. Technol.*, 2020, **42**, 2053-2062.
- [9] M. Dargahi, M. Feizi, S. Shahsavarifar, M. Masteri-Farahani, *Environ. Sci. Pollut. Res.*, 2020, **27**, 12047-12054.
